# Supplementary material
Source: MDPI journal article supplement (https://www.mdpi.com/2077-0472/13/3/533)
Supplement: s1 [file s1]

**Supplementary Table S1.** Characteristics based on plant-growth promoting properties, hydrolytic enzyme production and tannin tolerances of endophytic bacteria isolated from tea leaves.

| Isolate                                 | Indoles<br>( $\mu\text{g/mL}$ ) | Phosphate<br>solubili-<br>zation | Sidero-<br>phore | Protease | Cellulase | Pectinase | Tannin (g/L) |
|-----------------------------------------|---------------------------------|----------------------------------|------------------|----------|-----------|-----------|--------------|
| <i>Bacillus altitudinis</i> P-1.10      | 6.25 $\pm$ 0.09                 | +                                | +                | +        | +         | +         | 30           |
| <i>Bacillus altitudinis</i> P-1.16      | 6.91 $\pm$ 0.02                 | +                                | +                | +        | +         | +         | 0            |
| <i>Bacillus altitudinis</i> P-1.17      | 7.25 $\pm$ 0.11                 | ++                               | +                | +++      | +         | +         | 10           |
| <i>Bacillus altitudinis</i> P-1.6       | 5.71 $\pm$ 0.04                 | +                                | +                | +        | +         | +         | 0            |
| <i>Bacillus altitudinis</i> P-1.7       | 6.48 $\pm$ 0.07                 | ++                               | ++               | ++       | +         | -         | 30           |
| <i>Bacillus altitudinis</i> P-1.9       | 6.98 $\pm$ 0.02                 | +                                | +                | ++       | +         | -         | 10           |
| <i>Bacillus altitudinis</i> P-2.1       | 6.11 $\pm$ 0.16                 | +                                | +                | ++       | +         | +         | 10           |
| <i>Bacillus altitudinis</i> P-2.10      | 7.09 $\pm$ 0.13                 | ++                               | +                | ++       | +         | +         | 30           |
| <i>Bacillus altitudinis</i> P-2.12      | 5.68 $\pm$ 0.09                 | +                                | ++               | ++       | +         | -         | 30           |
| <i>Bacillus altitudinis</i> P-2.14      | 6.89 $\pm$ 0.07                 | +                                | ++               | +        | +         | +         | 10           |
| <i>Bacillus altitudinis</i> P-2.17      | 7.27 $\pm$ 0.07                 | +                                | +                | ++       | +         | -         | 30           |
| <i>Bacillus altitudinis</i> P-2.18      | 5.71 $\pm$ 0.09                 | +                                | +                | +        | +         | -         | 30           |
| <i>Bacillus altitudinis</i> P-2.19      | 6.98 $\pm$ 0.07                 | +                                | ++               | ++       | +         | +         | 30           |
| <i>Bacillus altitudinis</i> P-2.20      | 7.33 $\pm$ 0.11                 | +                                | +                | +        | +         | +         | 0            |
| <i>Bacillus altitudinis</i> P-2.21      | 7.38 $\pm$ 0.22                 | +                                | ++               | +        | +         | +         | 30           |
| <i>Bacillus altitudinis</i> P-2.4       | 5.56 $\pm$ 0.04                 | +                                | +                | +        | +         | +         | 30           |
| <i>Bacillus altitudinis</i> P-2.5       | 6.47 $\pm$ 0.0                  | ++                               | ++               | ++       | +         | -         | 0            |
| <i>Bacillus altitudinis</i> P-2.6       | 5.82 $\pm$ 0.02                 | +                                | +                | +        | +         | +         | 10           |
| <i>Bacillus altitudinis</i> P-2.7       | 6.25 $\pm$ 0.09                 | ++                               | +                | ++       | +         | -         | 10           |
| <i>Bacillus altitudinis</i> P-2.9       | 6.78 $\pm$ 0.04                 | +                                | +                | +        | +         | +         | 10           |
| <i>Bacillus altitudinis</i> P-3.16      | 7.94 $\pm$ 0.13                 | +                                | +                | +        | +         | -         | 0            |
| <i>Bacillus altitudinis</i> P-3.17      | 7.24 $\pm$ 0.11                 | +                                | +                | ++       | +         | -         | 30           |
| <i>Bacillus altitudinis</i> P-3.20      | 7.47 $\pm$ 0.04                 | +                                | +                | +        | +         | +         | 10           |
| <i>Bacillus altitudinis</i> P-3.3       | 6.76 $\pm$ 0.16                 | +                                | +                | +        | +         | -         | 10           |
| <i>Bacillus altitudinis</i> P-3.8       | 8.25 $\pm$ 0.22                 | +                                | +                | ++       | +         | -         | 0            |
| <i>Bacillus altitudinis</i> P-4.2       | 6.38 $\pm$ 0.09                 | +                                | +                | +        | +         | -         | 30           |
| <i>Bacillus altitudinis</i> P-4.4       | 6.55 $\pm$ 0.07                 | +                                | +                | +        | +         | -         | 30           |
| <i>Bacillus altitudinis</i> P-4.6       | 4.65 $\pm$ 0.04                 | +                                | +                | ++       | +         | +         | 30           |
| <i>Bacillus altitudinis</i> P-4.7       | 5.64 $\pm$ 0.11                 | ++                               | ++               | ++       | +         | +         | 10           |
| <i>Bacillus altitudinis</i> P-5.15      | 5.61 $\pm$ 0.07                 | ++                               | +                | +        | +         | -         | 30           |
| <i>Bacillus altitudinis</i> P-5.5       | 6.78 $\pm$ 0.04                 | ++                               | +                | +        | +         | -         | 0            |
| <i>Bacillus mediterraneensis</i> P-2.22 | 23.91 $\pm$ 0.33                | +                                | -                | +        | -         | +         | 50           |
| <i>Bacillus safensis</i> P-5.4          | 7.33 $\pm$ 0.02                 | ++                               | +                | +        | -         | -         | 30           |
| <i>Bacillus thuringiensis</i> P-3.10    | 17.08 $\pm$ 0.11                | -                                | -                | +        | -         | +         | 50           |

|                                           |             |     |    |     |   |   |    |
|-------------------------------------------|-------------|-----|----|-----|---|---|----|
| <i>Bacillus thuringiensis</i> P-3.5       | 14.35±0.07  | -   | -  | +   | - | + | 50 |
| <i>Curtobacterium citreum</i> P-4.10      | 133±3.1     | +   | +  | +++ | + | - | 0  |
| <i>Curtobacterium citreum</i> P-5.19      | 71.12±0.27  | ++  | +  | ++  | + | - | 0  |
| <i>Enterobacter wuhouensis</i> P-4.18     | 124.55±2.67 | +++ | -  | -   | - | - | 50 |
| <i>Microbacterium arborescens</i> P-5.23  | 24.92±0.13  | +   | +  | -   | - | + | 10 |
| <i>Microbacterium testaceum</i> P-1.13    | 91.94±1.32  | +   | ++ | +++ | - | - | 30 |
| <i>Microbacterium testaceum</i> P-1.14    | 71.88±3.1   | +   | +  | ++  | - | - | 10 |
| <i>Microbacterium testaceum</i> P-1.5     | 61.07±1.56  | +   | +  | ++  | - | - | 10 |
| <i>Microbacterium testaceum</i> P-3.9     | 72.64±0.29  | +   | ++ | ++  | - | - | 30 |
| <i>Microbacterium testaceum</i> P-4.3     | 62.78±0     | +   | ++ | +++ | - | - | 30 |
| <i>Microbacterium testaceum</i> P-5.10    | 88.3±0.13   | +   | +  | ++  | - | - | 10 |
| <i>Microbacterium testaceum</i> P-5.12    | 106.2±4.21  | +   | +  | +   | - | - | 30 |
| <i>Microbacterium testaceum</i> P-5.17    | 119.53±6.2  | +   | ++ | ++  | - | + | 50 |
| <i>Microbacterium testaceum</i> P-5.18    | 64.02±0.09  | +   | +  | ++  | - | + | 30 |
| <i>Microbacterium testaceum</i> P-5.20    | 72.35±0.49  | +   | ++ | ++  | - | - | 50 |
| <i>Microbacterium testaceum</i> P-5.21    | 83.21±2.21  | +   | ++ | ++  | - | - | 50 |
| <i>Moraxella osloensis</i> P-1.18         | 7.69±0      | +   | +  | -   | - | - | 30 |
| <i>Moraxella osloensis</i> P-2.16         | 4.68±0.09   | -   | +  | -   | - | - | 50 |
| <i>Neobacillus niacini</i> P-5.11         | 17.99±0.02  | +   | +  | -   | - | + | 30 |
| <i>Priestia aryabhatai</i> P-5.13         | 59.5±2.44   | -   | -  | +++ | + | + | 30 |
| <i>Priestia megaterium</i> P-3.1          | 29.23±0.35  | -   | +  | +++ | + | + | 30 |
| <i>Priestia megaterium</i> P-3.14         | 31.98±0.44  | -   | +  | +++ | + | + | 30 |
| <i>Priestia megaterium</i> P-3.18         | 45.55±2.21  | -   | +  | +++ | + | + | 30 |
| <i>Priestia megaterium</i> P-3.23         | 42.26±0.22  | -   | +  | +++ | + | + | 30 |
| <i>Pseudarthrobacter enclensis</i> P-3.11 | 141.16±2.21 | -   | +  | -   | + | + | 50 |
| <i>Pseudarthrobacter enclensis</i> P-3.12 | 141.47±0.44 | -   | ++ | -   | + | + | 50 |
| <i>Pseudarthrobacter enclensis</i> P-3.13 | 135.05±4.21 | -   | +  | -   | + | + | 50 |
| <i>Pseudarthrobacter enclensis</i> P-3.7  | 133.64±6.21 | -   | +  | -   | + | + | 50 |
| <i>Pseudarthrobacter enclensis</i> P-4.20 | 133±2.66    | -   | +  | -   | + | + | 30 |
| <i>Pseudomonas stutzeri</i> P-1.2         | 19.32±0.04  | -   | +  | -   | - | - | 0  |
| <i>Sporosarcina luteola</i> P-2.8         | 11.34±0.29  | -   | -  | -   | - | - | 0  |
| <i>Staphylococcus argenteus</i> P-1.11    | 8.22±0.04   | ++  | ++ | -   | - | + | 50 |
| <i>Staphylococcus argenteus</i> P-2.3     | 9.24±0.07   | ++  | ++ | -   | - | + | 50 |
| <i>Staphylococcus argenteus</i> P-5.6     | 8.49±0.02   | +   | +  | -   | - | + | 0  |
| <i>Staphylococcus argenteus</i> P-5.9     | 7.15±0      | +   | +  | -   | - | + | 0  |
| <i>Staphylococcus haemolyticus</i> P-5.2  | 7.56±0.04   | +++ | ++ | -   | + | + | 0  |

**Note:** The symbol, - represents negative, + represents positive/weak, (++) intermediate, (+++) very strong.
